# Supplementary material for: Neural Stem/Progenitor Cell Transplantation in Parkinson’s Rodent Animals: A Meta-Analysis and Systematic Review
Source: PubMed Central journal article supplement (PMC9052406; doi:10.1093/stcltm/szac006), 2022-03-23
Supplement: szac006_suppl_supplementary_material.pdf [file szac006_suppl_supplementary_material.pdf]

Table S1. Detailed Characteristics of 21 Reviewed Studies

| Author        | Year | Animal              |       |        |        | PD model | Cell administration |                    |                     |                   | Immuno suppressant | Follow-up period | Severe adverse event report |
|---------------|------|---------------------|-------|--------|--------|----------|---------------------|--------------------|---------------------|-------------------|--------------------|------------------|-----------------------------|
|               |      | Species             | Age   | Gender | Number |          | Source              | Time (post-injury) | Site                | Dosage (cells/Kg) |                    |                  |                             |
| Richardson[1] | 2005 | Fisher 344 rats     | adult | male   | 14     | 6-OHDA   | Adult rat brain     | 2 weeks            | unilateral striatum | 1.0E+06           | no                 | 2 weeks          | -                           |
| Xu[2]         | 2005 | Sprague-Dawley rats | adult | -      | 18     | 6-OHDA   | Mouse ESC           | 4 weeks            | unilateral striatum | 2.5E+07           | yes                | 6 weeks          | Yes                         |
| Anderson[3]   | 2007 | Lewis rats          | adult | female | 14     | 6-OHDA   | Human fetal brain   | 3 weeks            | substantia nigra    | 5.0E+05           | yes                | 20 weeks         | -                           |
| Ravindran[4]  | 2008 | Wistar rats         | adult | male   | 32     | 6-OHDA   | Human ESC           | 4-6 weeks          | substantia nigra    | 6.0E+06           | yes                | 12 weeks         | Yes                         |
| Madhavan[5]   | 2009 | Fisher 344 rats     | adult | male   | 25     | 6-OHDA   | Rat fetal brain     | 1 week             | substantia nigra    | 1.0E+06           | no                 | 5 weeks          | -                           |
| Feng[6]       | 2009 | Sprague-Dawley rats | adult | male   | 13     | 6-OHDA   | Rat fetal brain     | 5 weeks            | unilateral striatum | 2.5E+05           | no                 | 16 weeks         | -                           |
| Feng[6]       | 2009 | Sprague-Dawley rats | adult | male   | 19     | 6-OHDA   | Rat fetal brain     | 5 weeks            | substantia nigra    | 2.5E+05           | no                 | 16 weeks         | -                           |
| Moreno[7]     | 2012 | Sprague-Dawley rats | adult | female | 32     | 6-OHDA   | Human NSC           | 6 weeks            | unilateral striatum | 1.5E+06           | yes                | 16 weeks         | -                           |
| Deng[8]       | 2013 | Sprague-Dawley rats | adult | male   | 12     | 6-OHDA   | Rat fetal brain     | 1 week             | unilateral striatum | 1.3E+06           | no                 | 8 weeks          | -                           |
| Yoon[9]       | 2013 | Sprague-Dawley rats | adult | -      | 15     | 6-OHDA   | Human fetal brain   | 3 weeks            | unilateral striatum | 5.0E+06           | Yes                | 8 weeks          | -                           |
| Parra-Cid[10] | 2014 | Wistar rats         | adult | male   | 16     | 6-OHDA   | Mouse ENSC          | 7 weeks            | substantia nigra    | 1.5E+06           | No                 | 3 weeks          | -                           |
| Shin[11]      | 2014 | Sprague-Dawley rats | adult | female | 16     | 6-OHDA   | Human NSC           | 4 weeks            | unilateral striatum | 4.0E+05           | yes                | 8 weeks          | -                           |
| Han[12]       | 2015 | Sprague-Dawley rats | adult | male   | 16     | 6-OHDA   | Human iPSC          | 4 weeks            | unilateral striatum | 2.5E+06           | yes                | 16 weeks         | -                           |
| Moon[13]      | 2017 | Sprague-Dawley rats | adult | female | 36     | 6-OHDA   | Human fetal brain   | 4 weeks            | unilateral striatum | 2.3E+06           | yes                | 12 weeks         | Yes                         |
| Zuo[14]       | 2017 | C57 mice            | adult | female | 12     | 6-OHDA   | Human fetal brain   | 1 week             | unilateral striatum | 2.5E+06           | no                 | 8 weeks          | -                           |
| Kim[15]       | 2018 | Sprague-Dawley rats | adult | female | 24     | 6-OHDA   | Human MSC           | 4 weeks            | unilateral striatum | 1.5E+06           | yes                | 9 weeks          | Yes                         |

|                    |      |                     |       |        |    |        |                   |         |                               |         |     |          |     |
|--------------------|------|---------------------|-------|--------|----|--------|-------------------|---------|-------------------------------|---------|-----|----------|-----|
| MENDES-PINHEIR[16] | 2018 | Wistar rats         | adult | male   | 10 | 6-OHDA | Human NSC         | 5 weeks | substantia nigra and striatum | 2.0E+06 | no  | 7 weeks  | -   |
| Mine[17]           | 2018 | Sprague-Dawley rats | adult | male   | 22 | 6-OHDA | Swine fetal brain | 4 weeks | unilateral striatum           | 1.0E+05 | yes | 8 weeks  | Yes |
| Mine[17]           | 2018 | Wistar rats         | adult | male   | 22 | 6-OHDA | Rat fetal brain   | 4 weeks | unilateral striatum           | 1.0E+05 | yes | 8 weeks  | Yes |
| Song[18]           | 2018 | Sprague-Dawley rats | adult | female | 12 | 6-OHDA | mouse fetal brain | 4 weeks | unilateral striatum           | 4.5E+06 | yes | 24 weeks | -   |
| Qian[19]           | 2020 | Sprague-Dawley rats | adult | male   | 12 | 6-OHDA | Rat fetal brain   | 2 weeks | unilateral striatum           | 2.3E+06 | no  | 12 weeks | -   |

These documents were ranked in order of the year. *NSC*, neural stem cell; *iPSC*, induced pluripotent stem cell; *ESC*, embryonic stem cell; *MSC*, mesenchymal stem cell; -, not studied.

## Supplementary References

1. Richardson, R.M., et al., *Grafts of adult subependymal zone neuronal progenitor cells rescue hemiparkinsonian behavioral decline*. Brain Res, 2005. **1032**(1-2): p. 11-22.
2. Xu, H., et al., *Neural precursor cells differentiated from mouse embryonic stem cells relieve symptomatic motor behavior in a rat model of Parkinson's disease*. Biochem Biophys Res Commun, 2005. **326**(1): p. 115-22.
3. Anderson, L. and M.A. Caldwell, *Human neural progenitor cell transplants into the subthalamic nucleus lead to functional recovery in a rat model of Parkinson's disease*. Neurobiol Dis, 2007. **27**(2): p. 133-40.
4. Geeta, R., et al., *One year survival and significant reversal of motor deficits in parkinsonian rats transplanted with hESC derived dopaminergic neurons*. Biochem Biophys Res Commun, 2008. **373**(2): p. 258-64.
5. Madhavan, L., et al., *Transplantation of subventricular zone neural precursors induces an endogenous precursor cell response in a rat model of Parkinson's disease*. J Comp Neurol, 2009. **515**(1): p. 102-15.
6. Zhu, Q., et al., *Grafted neural stem cells migrate to substantia nigra and improve behavior in Parkinsonian rats*. Neurosci Lett, 2009. **462**(3): p. 213-8.
7. Ramos-Moreno, T., C.G. Castillo, and A. Martinez-Serrano, *Long term behavioral effects of functional dopaminergic neurons generated from human neural stem cells in the rat 6-OH-DA Parkinson's disease model. Effects of the forced expression of BCL-X(L)*. Behav Brain Res, 2012. **232**(1): p. 225-32.
8. Deng, X., et al., *Co-transplantation of GDNF-overexpressing neural stem cells and fetal dopaminergic neurons mitigates motor symptoms in a rat model of Parkinson's disease*. PLoS One, 2013. **8**(12): p. e80880.
9. Yoon, H.H., et al., *Are human dental papilla-derived stem cell and human brain-derived neural stem cell transplantations suitable for treatment of Parkinson's disease?* Neural Regen Res, 2013. **8**(13): p. 1190-200.
10. Parra-Cid, C., et al., *An enteric nervous system progenitor cell implant promotes a behavioral and neurochemical improvement in rats with a 6-OHDA-induced lesion*. Neurotoxicol Teratol, 2014. **43**: p. 45-50.
11. Shin, E.S., et al., *Enhanced efficacy of human brain-derived neural stem cells by transplantation of cell aggregates in a rat model of Parkinson's disease*. J Korean Neurosurg Soc, 2014. **56**(5): p. 383-9.
12. Han, F., et al., *Human induced pluripotent stem cell-derived neurons improve motor asymmetry in a 6-hydroxydopamine-induced rat model of Parkinson's disease*. Cytotherapy, 2015. **17**(5): p. 665-79.
13. Moon, J., et al., *Preclinical Analysis of Fetal Human Mesencephalic Neural Progenitor Cell Lines: Characterization and Safety In Vitro and In Vivo*. Stem Cells Transl Med, 2017. **6**(2): p. 576-588.
14. Zuo, F., et al., *Intrastriatal Transplantation of Human Neural Stem Cells Restores the Impaired Subventricular Zone in Parkinsonian Mice*. Stem Cells, 2017. **35**(6): p. 1519-1531.
15. Kim, H.W., et al., *Dual Effects of Human Placenta-Derived Neural Cells on Neuroprotection and the Inhibition of Neuroinflammation in a Rodent Model of Parkinson's Disease*. Cell Transplant, 2018. **27**(5): p. 814-830.
16. Mendes-Pinheiro, B., et al., *Secretome of Undifferentiated Neural Progenitor Cells Induces Histological and Motor Improvements in a Rat Model of Parkinson's Disease*. Stem Cells Transl Med, 2018. **7**(11): p. 829-838.
17. Mine, Y., et al., *Grafted Miniature-Swine Neural Stem Cells of Early Embryonic Mesencephalic Neuroepithelial Origin can Repair the Damaged Neural Circuitry of Parkinson's Disease Model Rats*. Neuroscience, 2018. **386**: p. 51-67.
18. Song, J.J., et al., *Cograftering astrocytes improves cell therapeutic outcomes in a Parkinson's disease model*. J Clin Invest, 2018. **128**(1): p. 463-482.
19. Qian, Y., et al., *Transplantation of Nurr1-overexpressing neural stem cells and microglia for treating parkinsonian rats*. CNS Neurosci Ther, 2020. **26**(1): p. 55-65.

Table S2. CAMARADES checklists of All 21 reviewed studies

| Study ID             | Publication in a peer-reviewed journal | Control of temperature | Random allocation to treatment or control | Allocation concealment | Blinded assessment of outcome | Avoidance of neuroprotective anesthetics | Animal model (without aged, diabetic, or hypertensive) | Sample size calculation | Compliance with animal welfare regulations | Statement of conflict of interest | Pretreatment behavioral assessment | Score |
|----------------------|----------------------------------------|------------------------|-------------------------------------------|------------------------|-------------------------------|------------------------------------------|--------------------------------------------------------|-------------------------|--------------------------------------------|-----------------------------------|------------------------------------|-------|
| Richardson 2005      | yes                                    | yes                    | yes                                       | no                     | no                            | no                                       | yes                                                    | no                      | yes                                        | no                                | no                                 | 4     |
| Xu 2005              | yes                                    | yes                    | no                                        | no                     | no                            | yes                                      | yes                                                    | no                      | yes                                        | no                                | yes                                | 5     |
| Anderson 2007        | yes                                    | yes                    | no                                        | no                     | no                            | yes                                      | yes                                                    | no                      | no                                         | yes                               | yes                                | 5     |
| Ravindran 2008       | yes                                    | no                     | no                                        | no                     | yes                           | no                                       | yes                                                    | no                      | yes                                        | no                                | yes                                | 5     |
| Madhavan 2009        | yes                                    | yes                    | no                                        | no                     | no                            | no                                       | yes                                                    | no                      | yes                                        | yes                               | no                                 | 5     |
| Feng 2009            | yes                                    | no                     | no                                        | no                     | yes                           | no                                       | yes                                                    | no                      | no                                         | no                                | yes                                | 4     |
| Moreno 2012          | yes                                    | yes                    | yes                                       | no                     | no                            | no                                       | yes                                                    | no                      | yes                                        | no                                | yes                                | 6     |
| Deng 2013            | yes                                    | yes                    | yes                                       | no                     | no                            | yes                                      | yes                                                    | no                      | yes                                        | no                                | yes                                | 7     |
| Yoon 2013            | yes                                    | yes                    | yes                                       | no                     | no                            | yes                                      | yes                                                    | no                      | yes                                        | yes                               | yes                                | 8     |
| Parra-Cid 2014       | yes                                    | yes                    | yes                                       | no                     | no                            | yes                                      | yes                                                    | no                      | yes                                        | yes                               | yes                                | 8     |
| Shin 2014            | yes                                    | no                     | no                                        | no                     | no                            | yes                                      | yes                                                    | no                      | yes                                        | no                                | no                                 | 4     |
| Han 2015             | yes                                    | no                     | no                                        | no                     | no                            | yes                                      | yes                                                    | no                      | yes                                        | yes                               | no                                 | 5     |
| Moon 2017            | yes                                    | yes                    | yes                                       | no                     | no                            | no                                       | yes                                                    | no                      | yes                                        | yes                               | yes                                | 7     |
| Zuo 2017             | yes                                    | yes                    | yes                                       | no                     | no                            | yes                                      | yes                                                    | no                      | yes                                        | yes                               | yes                                | 8     |
| Kim 2018             | yes                                    | yes                    | yes                                       | no                     | no                            | no                                       | yes                                                    | no                      | yes                                        | yes                               | yes                                | 7     |
| Mendes-Pinheiro 2018 | yes                                    | yes                    | no                                        | no                     | no                            | no                                       | yes                                                    | no                      | yes                                        | yes                               | yes                                | 6     |
| Mine 2018            | yes                                    | yes                    | yes                                       | no                     | yes                           | yes                                      | yes                                                    | no                      | yes                                        | yes                               | yes                                | 9     |
| Song 2018            | yes                                    | yes                    | yes                                       | no                     | yes                           | yes                                      | yes                                                    | no                      | yes                                        | yes                               | yes                                | 9     |
| Qian 2020            | yes                                    | no                     | yes                                       | no                     | no                            | yes                                      | yes                                                    | no                      | yes                                        | yes                               | yes                                | 7     |
| <b>Total</b>         | 19                                     | 14                     | 11                                        | 0                      | 4                             | 11                                       | 19                                                     | 0                       | 17                                         | 12                                | 15                                 |       |
| <b>Percentage</b>    | 100.0%                                 | 73.7%                  | 57.9%                                     | 0.0%                   | 21.1%                         | 57.9%                                    | 100.0%                                                 | 0.0%                    | 89.5%                                      | 63.2%                             | 78.9%                              |       |

Table S3. Outcome type of all 21 included studies

| Author          | Year | Densitometry of TH+ staining in the SNpc | Apomorphine-induced rotation | Amphetamine-induced rotation | Limb function |               |
|-----------------|------|------------------------------------------|------------------------------|------------------------------|---------------|---------------|
|                 |      |                                          |                              |                              | Stepping test | Cylinder test |
| Richardson      | 2005 | -                                        | -                            | ✓                            | -             | -             |
| Xu              | 2005 | -                                        | ✓                            | -                            | -             | -             |
| Anderson        | 2007 | -                                        | -                            | ✓                            | -             | -             |
| Ravindran       | 2008 | -                                        | ✓                            | -                            | ✓             | -             |
| Madhavan        | 2009 | ✓                                        | -                            | -                            | -             | -             |
| Feng (1)        | 2009 | -                                        | ✓                            | -                            | -             | -             |
| Feng (2)        | 2009 | -                                        | ✓                            | -                            | -             | -             |
| Moreno          | 2012 | -                                        | ✓                            | ✓                            | ✓             | ✓             |
| Deng            | 2013 | -                                        | ✓                            | -                            | -             | -             |
| Yoon            | 2013 | -                                        | ✓                            | -                            | ✓             | -             |
| Parra-Cid       | 2014 | -                                        | -                            | -                            | ✓             | ✓             |
| Shin            | 2014 | -                                        | ✓                            | -                            | ✓             | -             |
| Han             | 2015 | -                                        | ✓                            | -                            | -             | -             |
| Moon            | 2017 | -                                        | -                            | ✓                            | -             | -             |
| Zuo             | 2017 | -                                        | ✓                            | -                            | -             | -             |
| Kim             | 2018 | ✓                                        | -                            | ✓                            | -             | ✓             |
| Mendes-Pinheiro | 2018 | ✓                                        | -                            | -                            | -             | ✓             |
| Mine (1)        | 2018 | -                                        | -                            | ✓                            | -             | -             |
| Mine (2)        | 2018 | -                                        | -                            | ✓                            | -             | -             |
| Song            | 2018 | -                                        | -                            | ✓                            | ✓             | ✓             |
| Qian            | 2020 | ✓                                        | ✓                            | -                            | -             | -             |
| <b>Total</b>    |      | 4                                        | 11                           | 8                            | 6             | 5             |
